# Supplementary material for: New Trends in Pollution Prevention and Control Technology for Healthcare and Medical Waste Disposal in China
Source: MDPI journal article supplement (doi:10.3390/pr12010007), 2023-12-19
Supplement: s1 [file s1]

# Supplementary material

**Table S1. Top 10 patentees in the field of healthcare and medical waste disposal technology in China.**

| Patentees                                                                                             | No. | Patent Value (USD) |
|-------------------------------------------------------------------------------------------------------|-----|--------------------|
| Shandong Xinhua Medical Environmental Protection Equipment Ltd. (Xinhua Ltd.)                         | 102 | 33,700             |
| Beijing Da Bai Sha Environmental Protection Technology Ltd. (Da Bai Sha Ltd.)                         | 60  | 137,900            |
| Ouerdong Chaoyang Environmental Protection Group Inc. (Ouerdong Inc.)                                 | 53  | 176,800            |
| Henan Liying Environmental Protection Technology Inc. (Liying Inc.)                                   | 52  | 85,000             |
| Beikong Annaide Environmental Protection Technology Development Changzhou Ltd. (Beikong Annaide Ltd.) | 50  | 33,200             |
| Beijing Runtai Environmental Protection Technology Ltd. (Runtai Ltd.)                                 | 43  | 24,800             |
| Changde Anbang Medical Waste Disposal Ltd. (Anbang Ltd.)                                              | 24  | 37,100             |
| Changsha Huiyang Environmental Protection Technology Inc. (Huiyang Inc.)                              | 22  | 24,800             |
| Fujian Langqiankun Environmental Protection Technology Ltd. (Langqiankun Ltd.)                        | 20  | 33,100             |
| Nanchang Medical Waste Disposal Center Ltd. (Nanchang Ltd.)                                           | 17  | 41,100             |

**Table S2. Details of major technologies of the IPC categories\*.**

| Technical classification |                        |                                   | Major IPC Subgroup | IPC definitions                                                                                                                                                                                                                                                                                                                                                                                                                                                                                                                             |
|--------------------------|------------------------|-----------------------------------|--------------------|---------------------------------------------------------------------------------------------------------------------------------------------------------------------------------------------------------------------------------------------------------------------------------------------------------------------------------------------------------------------------------------------------------------------------------------------------------------------------------------------------------------------------------------------|
| Waste disposal           | Collection and storage | Collection                        | B65F1/00           | Refuse receptacles (containers not specially adapted for refuse, features of refuse receptacles of general interest B65D) [1, 2006.01]                                                                                                                                                                                                                                                                                                                                                                                                      |
|                          |                        |                                   | A61J1              | Containers specially adapted for medical or pharmaceutical purposes (capsules or the like for oral use A61J 3/07; specially adapted for surgical or diagnostic appliances or instruments A61B 50/30; containers for radioactive substances G21F 5/00) [1, 4, 5, 2006.01]                                                                                                                                                                                                                                                                    |
|                          |                        |                                   | B02C4/00           | Crushing or disintegrating by roller mills (with milling members in the form of rollers or balls co-operating with rings or discs B02C 15/00; roller mills or roll refiners exclusively for chocolate A23G 1/10, A23G 1/12) [1, 2006.01]                                                                                                                                                                                                                                                                                                    |
|                          |                        |                                   | B65D51/00          | Closures not otherwise provided for (covers or similar closures as engineering elements for pressure vessels in general F16J 13/00) [1, 2006.01]                                                                                                                                                                                                                                                                                                                                                                                            |
|                          |                        |                                   | B65D55/00          | Accessories for container closures not otherwise provided for [1, 2006.01]                                                                                                                                                                                                                                                                                                                                                                                                                                                                  |
|                          |                        | Storage                           | G21F5/00           | Transportable or portable shielded containers [1, 2006.01]                                                                                                                                                                                                                                                                                                                                                                                                                                                                                  |
|                          | Transfer and transport | Transfer and transport containers | B65D25/00          | Details of other kinds or types of rigid or semi-rigid containers [1, 2006.01]                                                                                                                                                                                                                                                                                                                                                                                                                                                              |
|                          |                        | Transfer and transport devices    | B65G47/00          | Article or material-handling devices associated with conveyors; Methods employing such devices [1, 2006.01]                                                                                                                                                                                                                                                                                                                                                                                                                                 |
|                          | Pretreatment           | Crushing                          | B02C18/00          | Disintegrating by knives or other cutting or tearing members which chop material into fragments (slicing B26D); Mincing machines or similar apparatus using worms or the like (machines for domestic use not covered otherwise A47J 43/04; multi-purpose machines for preparing food A47J 44/00) [1, 2006.01]                                                                                                                                                                                                                               |
|                          |                        |                                   | B02C4/00           | Crushing or disintegrating by roller mills (with milling members in the form of rollers or balls co-operating with rings or discs B02C 15/00; roller mills or roll refiners exclusively for chocolate A23G 1/10, A23G 1/12) [1, 2006.01]                                                                                                                                                                                                                                                                                                    |
|                          |                        |                                   | B02C21/00          | Disintegrating plant with or without drying of the material (for grain B02C 9/04) [1, 2006.01]                                                                                                                                                                                                                                                                                                                                                                                                                                              |
|                          |                        | Feeding/discharging               | F23G5/00           | Methods or apparatus, e.g. incinerators, specially adapted for combustion of waste or low-grade fuels [1, 4, 2006.01]                                                                                                                                                                                                                                                                                                                                                                                                                       |
|                          |                        |                                   | B65F1/00           | Refuse receptacles (containers not specially adapted for refuse, features of refuse receptacles of general interest B65D) [1, 2006.01]                                                                                                                                                                                                                                                                                                                                                                                                      |
|                          |                        |                                   | B65G5/00           | Storing fluids in natural or artificial cavities or chambers in the earth [1, 2006.01]                                                                                                                                                                                                                                                                                                                                                                                                                                                      |
|                          | Disposal and recycling | Disposal                          | F23G5/00           | Methods or apparatus, e.g. incinerators, specially adapted for combustion of waste or low-grade fuels [1, 4, 2006.01]                                                                                                                                                                                                                                                                                                                                                                                                                       |
|                          |                        |                                   | F23G7/00           | Methods or apparatus, e.g. incinerators, specially adapted for combustion of specific waste or low grade fuels, e.g. chemicals (F23G 1/00 takes precedence; incinerator closets A47K 11/02; oxidation of sludge C02F 11/06; incinerating radioactive waste G21F 9/00) [1, 4, 2006.01]                                                                                                                                                                                                                                                       |
|                          |                        |                                   | A61L11/00          | Disinfection or sterilising methods specially adapted for refuse [1, 2006.01]                                                                                                                                                                                                                                                                                                                                                                                                                                                               |
|                          |                        |                                   | A61L2/00           | Methods or apparatus for disinfecting or sterilising materials or objects other than foodstuffs or contact lenses; Accessories therefor (atomisers for disinfecting agents A61M; sterilisation of packages or package contents in association with packaging B65B 55/00; treatment of water, waste water, sewage or sludge C02F; disinfecting paper D21H 21/36; disinfecting devices for water closets E03D; articles having provision for disinfection, see the relevant subclasses for these articles, e.g. H04R 1/12) [3, 5, 7, 2006.01] |
|                          |                        |                                   | C10B53/00          | Destructive distillation, specially adapted for particular solid raw materials or solid raw materials in special form (wet carbonising of peat C10F) [1, 2006.01]                                                                                                                                                                                                                                                                                                                                                                           |
|                          |                        | Recycling                         | C10B53/00          | Destructive distillation, specially adapted for particular solid raw materials or solid raw materials in special form (wet carbonising of peat C10F) [1, 2006.01]                                                                                                                                                                                                                                                                                                                                                                           |

\* [https://www.wipo.int/ipc/itos4ipc/ITSupport\\_and\\_download\\_area/20220101/pdf/scheme/full\\_ipc/en/index.html](https://www.wipo.int/ipc/itos4ipc/ITSupport_and_download_area/20220101/pdf/scheme/full_ipc/en/index.html)

|                                       |                                                                                                                   |                                                                                                                                                                                                                                                                                                                                                                                                                             |                                  |                                                                                                                                                                                                                                                                                                                                                                                                                                       |                                                                                                                                                                                                                                                                                                                                                                                                                             |           |                                                                                                                                                                                                                                                                                                                                                                                                                             |
|---------------------------------------|-------------------------------------------------------------------------------------------------------------------|-----------------------------------------------------------------------------------------------------------------------------------------------------------------------------------------------------------------------------------------------------------------------------------------------------------------------------------------------------------------------------------------------------------------------------|----------------------------------|---------------------------------------------------------------------------------------------------------------------------------------------------------------------------------------------------------------------------------------------------------------------------------------------------------------------------------------------------------------------------------------------------------------------------------------|-----------------------------------------------------------------------------------------------------------------------------------------------------------------------------------------------------------------------------------------------------------------------------------------------------------------------------------------------------------------------------------------------------------------------------|-----------|-----------------------------------------------------------------------------------------------------------------------------------------------------------------------------------------------------------------------------------------------------------------------------------------------------------------------------------------------------------------------------------------------------------------------------|
|                                       |                                                                                                                   | Movable disposal                                                                                                                                                                                                                                                                                                                                                                                                            | C08J1/00                         | Recovery or working-up of waste materials (recovery of plastics B29B 17/00; polymerisation processes involving purification or recycling of waste polymers or their depolymerisation products C08B, C08C, C08F, C08G, C08H) [4, 2006.01]                                                                                                                                                                                              |                                                                                                                                                                                                                                                                                                                                                                                                                             |           |                                                                                                                                                                                                                                                                                                                                                                                                                             |
|                                       |                                                                                                                   |                                                                                                                                                                                                                                                                                                                                                                                                                             | C01G1/00                         | Methods of preparing compounds of metals not covered by subclasses C01B, C01C, C01D, C01F, in general (electrolytic production of inorganic compounds C25B 1/00) [1, 2, 2006.01]                                                                                                                                                                                                                                                      |                                                                                                                                                                                                                                                                                                                                                                                                                             |           |                                                                                                                                                                                                                                                                                                                                                                                                                             |
|                                       |                                                                                                                   |                                                                                                                                                                                                                                                                                                                                                                                                                             | C02F9/00                         | Multistep treatment of water, waste water or sewage [3, 2006.01]                                                                                                                                                                                                                                                                                                                                                                      |                                                                                                                                                                                                                                                                                                                                                                                                                             |           |                                                                                                                                                                                                                                                                                                                                                                                                                             |
|                                       |                                                                                                                   |                                                                                                                                                                                                                                                                                                                                                                                                                             | B01D53/00                        | Separation of gases or vapours; Recovering vapours of volatile solvents from gases; Chemical or biological purification of waste gases, e.g. engine exhaust gases, smoke, fumes, flue gases or aerosols (recovery of volatile solvents by condensation B01D 5/00; sublimation B01D 7/00; cold traps, cold baffles B01D 8/00; separation of difficult-to-condense gases or air by liquefaction F25J 3/00) [1, 3, 5, 2006.01]           |                                                                                                                                                                                                                                                                                                                                                                                                                             |           |                                                                                                                                                                                                                                                                                                                                                                                                                             |
|                                       |                                                                                                                   |                                                                                                                                                                                                                                                                                                                                                                                                                             | F23G7/00                         | Methods or apparatus, e.g. incinerators, specially adapted for combustion of specific waste or low grade fuels, e.g. chemicals (F23G 1/00 takes precedence; incinerator closets A47K 11/02; oxidation of sludge C02F 11/06; incinerating radioactive waste G21F 9/00) [1, 4, 2006.01]                                                                                                                                                 |                                                                                                                                                                                                                                                                                                                                                                                                                             |           |                                                                                                                                                                                                                                                                                                                                                                                                                             |
|                                       |                                                                                                                   |                                                                                                                                                                                                                                                                                                                                                                                                                             | Co-disposal                      | F23G5/00                                                                                                                                                                                                                                                                                                                                                                                                                              | Methods or apparatus, e.g. incinerators, specially adapted for combustion of waste or low-grade fuels [1, 4, 2006.01]                                                                                                                                                                                                                                                                                                       |           |                                                                                                                                                                                                                                                                                                                                                                                                                             |
|                                       |                                                                                                                   |                                                                                                                                                                                                                                                                                                                                                                                                                             |                                  | F23G1/00                                                                                                                                                                                                                                                                                                                                                                                                                              | Methods or apparatus specially adapted for cremation of human or animal carcasses [1, 2006.01]                                                                                                                                                                                                                                                                                                                              |           |                                                                                                                                                                                                                                                                                                                                                                                                                             |
|                                       |                                                                                                                   |                                                                                                                                                                                                                                                                                                                                                                                                                             |                                  | F23G7/00                                                                                                                                                                                                                                                                                                                                                                                                                              | Methods or apparatus, e.g. incinerators, specially adapted for combustion of specific waste or low grade fuels, e.g. chemicals (F23G 1/00 takes precedence; incinerator closets A47K 11/02; oxidation of sludge C02F 11/06; incinerating radioactive waste G21F 9/00) [1, 4, 2006.01]                                                                                                                                       |           |                                                                                                                                                                                                                                                                                                                                                                                                                             |
|                                       |                                                                                                                   |                                                                                                                                                                                                                                                                                                                                                                                                                             | Pollution prevention and control | Flue gas purification                                                                                                                                                                                                                                                                                                                                                                                                                 | Flue gas purification in waste unincineration processes                                                                                                                                                                                                                                                                                                                                                                     | B01D53/00 | Separation of gases or vapours; Recovering vapours of volatile solvents from gases; Chemical or biological purification of waste gases, e.g. engine exhaust gases, smoke, fumes, flue gases or aerosols (recovery of volatile solvents by condensation B01D 5/00; sublimation B01D 7/00; cold traps, cold baffles B01D 8/00; separation of difficult-to-condense gases or air by liquefaction F25J 3/00) [1, 3, 5, 2006.01] |
|                                       |                                                                                                                   |                                                                                                                                                                                                                                                                                                                                                                                                                             |                                  |                                                                                                                                                                                                                                                                                                                                                                                                                                       |                                                                                                                                                                                                                                                                                                                                                                                                                             | B01D46/00 | Filters or filtering processes specially modified for separating dispersed particles from gases or vapours (filtering elements B01D 24/00-B01D 35/00; filtering material B01D 39/00; their regeneration outside the filters B01D 41/00) [1, 2006.01, 2022.01]                                                                                                                                                               |
| Incineration flue gas purification    | B01D53/00                                                                                                         | Separation of gases or vapours; Recovering vapours of volatile solvents from gases; Chemical or biological purification of waste gases, e.g. engine exhaust gases, smoke, fumes, flue gases or aerosols (recovery of volatile solvents by condensation B01D 5/00; sublimation B01D 7/00; cold traps, cold baffles B01D 8/00; separation of difficult-to-condense gases or air by liquefaction F25J 3/00) [1, 3, 5, 2006.01] |                                  |                                                                                                                                                                                                                                                                                                                                                                                                                                       |                                                                                                                                                                                                                                                                                                                                                                                                                             |           |                                                                                                                                                                                                                                                                                                                                                                                                                             |
|                                       | Flue gas purification in sewage treatment                                                                         | B01D53/00                                                                                                                                                                                                                                                                                                                                                                                                                   |                                  |                                                                                                                                                                                                                                                                                                                                                                                                                                       | Separation of gases or vapours; Recovering vapours of volatile solvents from gases; Chemical or biological purification of waste gases, e.g. engine exhaust gases, smoke, fumes, flue gases or aerosols (recovery of volatile solvents by condensation B01D 5/00; sublimation B01D 7/00; cold traps, cold baffles B01D 8/00; separation of difficult-to-condense gases or air by liquefaction F25J 3/00) [1, 3, 5, 2006.01] |           |                                                                                                                                                                                                                                                                                                                                                                                                                             |
| C02F1/00                              |                                                                                                                   | Multistep treatment of water, waste water or sewage [3, 2006.01]                                                                                                                                                                                                                                                                                                                                                            |                                  |                                                                                                                                                                                                                                                                                                                                                                                                                                       |                                                                                                                                                                                                                                                                                                                                                                                                                             |           |                                                                                                                                                                                                                                                                                                                                                                                                                             |
| G01N33/00                             | Investigating or analysing materials by specific methods not covered by groups G01N 1/00- G01N 31/00 [1, 2006.01] |                                                                                                                                                                                                                                                                                                                                                                                                                             |                                  |                                                                                                                                                                                                                                                                                                                                                                                                                                       |                                                                                                                                                                                                                                                                                                                                                                                                                             |           |                                                                                                                                                                                                                                                                                                                                                                                                                             |
| Wastewater and waste liquid treatment | Waste water treatment                                                                                             | C02F9/00                                                                                                                                                                                                                                                                                                                                                                                                                    |                                  | Multistep treatment of water, waste water or sewage [3, 2006.01]                                                                                                                                                                                                                                                                                                                                                                      |                                                                                                                                                                                                                                                                                                                                                                                                                             |           |                                                                                                                                                                                                                                                                                                                                                                                                                             |
|                                       |                                                                                                                   | Waste liquid treatment                                                                                                                                                                                                                                                                                                                                                                                                      |                                  | C02F9/00                                                                                                                                                                                                                                                                                                                                                                                                                              | Multistep treatment of water, waste water or sewage [3, 2006.01]                                                                                                                                                                                                                                                                                                                                                            |           |                                                                                                                                                                                                                                                                                                                                                                                                                             |
|                                       |                                                                                                                   |                                                                                                                                                                                                                                                                                                                                                                                                                             |                                  | C02F1/00                                                                                                                                                                                                                                                                                                                                                                                                                              | Treatment of water, waste water, or sewage (C02F 3/00-C02F 9/00 take precedence) [3, 2006.01]                                                                                                                                                                                                                                                                                                                               |           |                                                                                                                                                                                                                                                                                                                                                                                                                             |
| Waste management                      | Management in collection and transportation                                                                       | Personal protective equipment                                                                                                                                                                                                                                                                                                                                                                                               |                                  | A41D13/00                                                                                                                                                                                                                                                                                                                                                                                                                             | Professional, industrial or sporting protective garments, e.g. surgeons' gowns or garments protecting against blows or punches (helmets A42B 3/00; clothing affording protection against chemical agents or for use at high altitudes A62B 17/00; life-saving garments for use at sea, diving suits B63C; bulletproof or armoured clothing F41H; clothing affording protection against radiation G21F 3/02) [1, 2006.01]    |           |                                                                                                                                                                                                                                                                                                                                                                                                                             |
|                                       | Management system                                                                                                 | Automatic control                                                                                                                                                                                                                                                                                                                                                                                                           | G05B19/00                        | Programme-control systems (specific applications, see the relevant places, e.g. A47L 15/46; clocks with attached or built-in means operating any device at a preselected time interval G04C 23/00; marking or sensing record carriers with digital information G06K; information storage G11; time or time-programme switches which automatically terminate their operation after the programme is completed H01H 43/00) [1, 2006.01] |                                                                                                                                                                                                                                                                                                                                                                                                                             |           |                                                                                                                                                                                                                                                                                                                                                                                                                             |

|  |                      |                                                            |               |                                                                                                                                                                                                                                                                                         |
|--|----------------------|------------------------------------------------------------|---------------|-----------------------------------------------------------------------------------------------------------------------------------------------------------------------------------------------------------------------------------------------------------------------------------------|
|  |                      | I<br>syste<br>m                                            | A61B5<br>0/00 | Containers, covers, furniture or holders specially adapted for surgical or diagnostic appliances or instruments, e.g. sterile covers (drapes specially adapted for instruments A61B 46/10) [2016.01]                                                                                    |
|  |                      |                                                            | B09B5<br>/00  | Operations not covered by a single other subclass or by a single other group in this subclass [3, 2006.01]                                                                                                                                                                              |
|  |                      |                                                            | B65G1<br>7/00 | Conveyors having an endless traction element, e.g. a chain, transmitting movement to a continuous or substantially-continuous load-carrying surface or to a series of individual load-carriers; Endless-chain conveyors in which the chains form the load-carrying surface [1, 2006.01] |
|  |                      |                                                            | G01F2<br>3/00 | Indicating or measuring liquid level or level of fluent solid material, e.g. indicating in terms of volume or indicating by means of an alarm [1, 2006.01, 2022.01]                                                                                                                     |
|  |                      |                                                            | G01G1<br>9/00 | Weighing apparatus or methods adapted for special purposes not provided for in groups G01G 11/00- G01G 17/00 [1, 2006.01]                                                                                                                                                               |
|  |                      |                                                            | G01G2<br>3/00 | Auxiliary devices for weighing apparatus [1, 2006.01]                                                                                                                                                                                                                                   |
|  | Evaluation<br>method | Super<br>vision<br>and<br>mana<br>geme<br>nt<br>syste<br>m | G06Q1<br>0/00 | Administration; Management [2006.01, 2012.01]                                                                                                                                                                                                                                           |
|  |                      | Speci<br>al<br>evalua<br>tion<br>metho<br>d                | G06Q5<br>0/00 | Systems or methods specially adapted for specific business sectors, e.g. utilities or tourism (healthcare informatics G16H) [2006.01, 2012.01]                                                                                                                                          |
